# Supplementary material for: Dyneins Across Eukaryotes: A Comparative Genomic Analysis
Source: PubMed Central journal article supplement (PMC2239267; doi:10.1111/j.1600-0854.2007.00646.x), 2007-09-26
Supplement: tra0008-1708_8_12dfig1.pdf [file tra0008-1708_8_12dfig1.pdf]

Sources and versions of genomic data used in this work.

| Organism                         | Source <sup>1</sup>      | Version              | Web reference                                                                    |
|----------------------------------|--------------------------|----------------------|----------------------------------------------------------------------------------|
| <i>Arabidopsis thaliana</i>      | TAIR                     | TAIR6_pep_20051108   | <a href="http://www.arabidopsis.org/">www.arabidopsis.org/</a>                   |
| <i>Caenorhabditis elegans</i>    | WormBase                 | WS150                | <a href="http://www.wormbase.org/">www.wormbase.org/</a>                         |
| <i>Chlamydomonas reinhardtii</i> | JGI                      | v3.0                 | <a href="http://www.chlamy.org/">www.chlamy.org/</a>                             |
| <i>Cryptosporidium parvum</i>    | cryptoDB                 | 3.3                  | <a href="http://cryptodb.org/cryptodb/">cryptodb.org/cryptodb/</a>               |
| <i>Cyanidioschyzon merolae</i>   | C.merolae genome project | -                    | <a href="http://merolae.biol.s.u-tokyo.ac.jp/">merolae.biol.s.u-tokyo.ac.jp/</a> |
| <i>Dictyostelium discoideum</i>  | dictyBase                | Primary              | <a href="http://dictybase.org/">dictybase.org/</a>                               |
| <i>Drosophila melanogaster</i>   | ENSEMBL                  | BDGP4.2              | <a href="http://www.ebi.ac.uk/ensembl/">www.ebi.ac.uk/ensembl/</a>               |
| <i>Entamoeba histolytica</i>     | geneDB                   | Proteins_17102005    | <a href="http://www.genedb.org/">www.genedb.org/</a>                             |
| <i>Giardia lamblia</i>           | GiardiaDB                | -                    | <a href="http://www.mbl.edu/Giardia/">www.mbl.edu/Giardia/</a>                   |
| <i>Homo sapiens</i>              | ENSEMBL                  | NCBI 36              | <a href="http://www.ebi.ac.uk/ensembl/">www.ebi.ac.uk/ensembl/</a>               |
| <i>Leishmania major</i>          | geneDB                   | v5                   | <a href="http://www.genedb.org/">www.genedb.org/</a>                             |
| <i>Oryza sativa</i>              | TIGR                     | v4.0                 | <a href="http://www.tigr.org/tdb/e2k1/osa1/">www.tigr.org/tdb/e2k1/osa1/</a>     |
| <i>Ostreococcus lucimarinus</i>  | JGI                      | v2.0                 | <a href="http://www.jgi.doe.gov/">www.jgi.doe.gov/</a>                           |
| <i>Phaeodactylum tricornutum</i> | JGI                      | v2.0                 | <a href="http://www.jgi.doe.gov/">www.jgi.doe.gov/</a>                           |
| <i>Phytophthora sojae</i>        | JGI                      | v1.1                 | <a href="http://www.jgi.doe.gov/">www.jgi.doe.gov/</a>                           |
| <i>Plasmodium falciparum</i>     | geneDB                   | 3D7 v2.1.1           | <a href="http://www.genedb.org/">www.genedb.org/</a>                             |
| <i>Populus trichocarpa</i>       | JGI                      | v1.1                 | <a href="http://www.jgi.doe.gov/">www.jgi.doe.gov/</a>                           |
| <i>Saccharomyces cerevisiae</i>  | ENSEMBL                  | SGD1                 | <a href="http://www.ebi.ac.uk/ensembl/">www.ebi.ac.uk/ensembl/</a>               |
| <i>Schizosaccharomyces pombe</i> | geneDB                   |                      | <a href="http://www.genedb.org/">www.genedb.org/</a>                             |
| <i>Takifugu rubripes</i>         | ENSEMBL                  | 4.0                  | <a href="http://www.ebi.ac.uk/ensembl/">www.ebi.ac.uk/ensembl/</a>               |
| <i>Tetrahymena thermophila</i>   | TGD                      | Predictions_Aug_2004 | <a href="http://www.ciliate.org/">www.ciliate.org/</a>                           |
| <i>Thalassiosira pseudonana</i>  | JGI                      | v1                   | <a href="http://www.jgi.doe.gov/">www.jgi.doe.gov/</a>                           |
| <i>Toxoplasma gondii</i>         | toxodb                   | v4.0                 | <a href="http://www.toxodb.org/">www.toxodb.org/</a>                             |
| <i>Trypanosoma brucei</i>        | geneDB                   | v4                   | <a href="http://www.genedb.org/">www.genedb.org/</a>                             |

<sup>1</sup> nb: Source of data does not necessarily correlate with sequencing centre(s). See individual projects for full acknowledgements of participants.
