# Supplementary material for: Dyneins Across Eukaryotes: A Comparative Genomic Analysis
Source: PubMed Central journal article supplement (PMC2239267; doi:10.1111/j.1600-0854.2007.00646.x), 2007-09-26

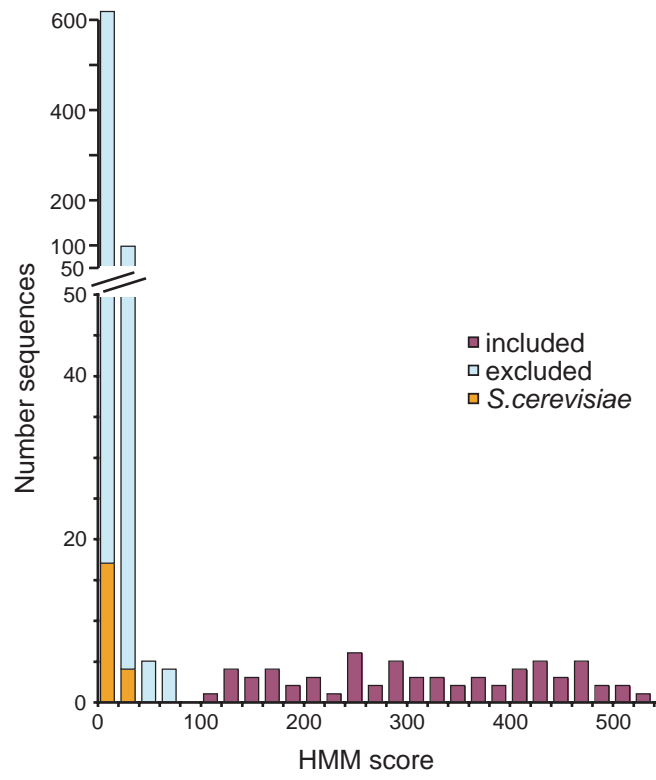

Supplement: tra0008-1708_8_12dfig7.pdf [file tra0008-1708_8_12dfig7.pdf]
